# Supplementary material for: Protective Effects Induced by Two Polyphenolic Liquid Complexes from Olive (Olea europaea, mainly Cultivar Coratina) Pressing Juice in Rat Isolated Tissues Challenged with LPS
Source: MDPI journal article supplement (doi:10.3390/molecules24163002), 2019-08-19
Supplement: s1 [file s1]

1 Article

2 **Protective effects induced by two polyphenolic liquid**  
 3 **complexes from olive (*Olea europaea*, mainly *Cultivar***  
 4 ***Coratina*) pressing juice in rat isolated tissues**  
 5 **challenged with LPS**

6 Lucia Recinella<sup>1,†</sup>, Annalisa Chiavaroli<sup>1,†</sup>, Giustino Orlando <sup>1</sup>, Luigi Menghini <sup>1</sup>, Claudio Ferrante <sup>1</sup>,  
 7 Lorenzo Di Cesare Mannelli <sup>2</sup>, Carla Ghelardini <sup>2</sup>, Luigi Brunetti <sup>1,\*</sup> and Sheila Leone <sup>1</sup>.

8 <sup>1</sup> Department of Pharmacy, “G. d’Annunzio” University, 66013 Chieti, Italy

9 <sup>2</sup> Department of Neuroscience, Psychology, Drug Research and Child Health - NEUROFARBA -  
 10 Pharmacology and Toxicology Section, University of Florence, 50139 Florence, Italy

11 \* Correspondence: luigi.brunetti@unich.it; Tel.: +39 0871 3554758

12 † The two authors contributed equally to the work.

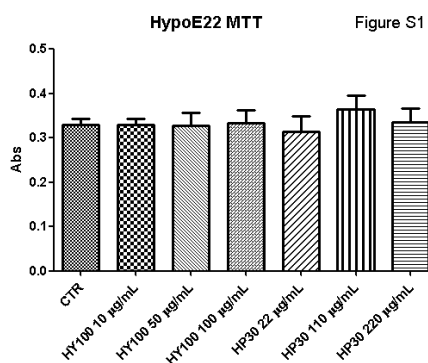

13

14 **Figure S1.** Effects of MOMAST<sup>®</sup> HY100 (10, 50, and 100 µg/mL) and MOMAST<sup>®</sup> HP30 (22, 110,  
 15 and 220 µg/mL) on HypoE22 cell line viability.

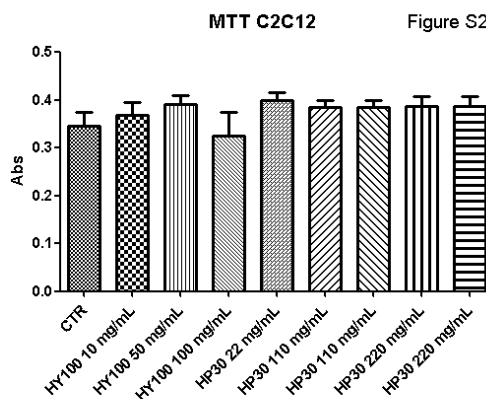

16

17 **Figure S2.** Effects of MOMAST<sup>®</sup> HY100 (10, 50, and 100 µg/mL) and MOMAST<sup>®</sup> HP30 (22, 110,  
 18 and 220 µg/mL) on C2C12 cell line viability.
